# Supplementary material
Source: HighWire-hosted journal article supplement (https://jnm.snmjournals.org/highwire/filestream/95238/field_highwire_adjunct_files/0/193847_Supplemental_Data.pdf)
Supplement: 193847_Supplemental_Data.pdf [file 193847_Supplemental_Data.pdf]

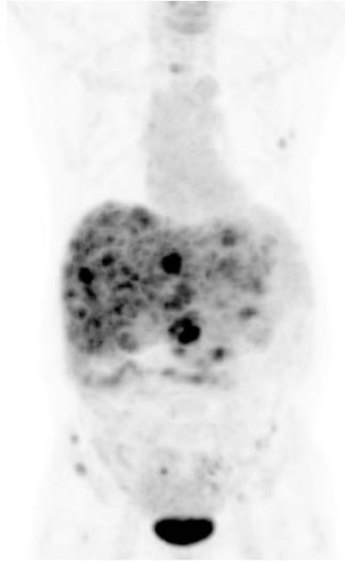

**SUPPLEMENTAL FIGURE 1.** <sup>18</sup>F-FDG PET maximum intensity projection (MIP) image of patient 1 performed one day prior to the administration of <sup>177</sup>Lu-3BP-227.

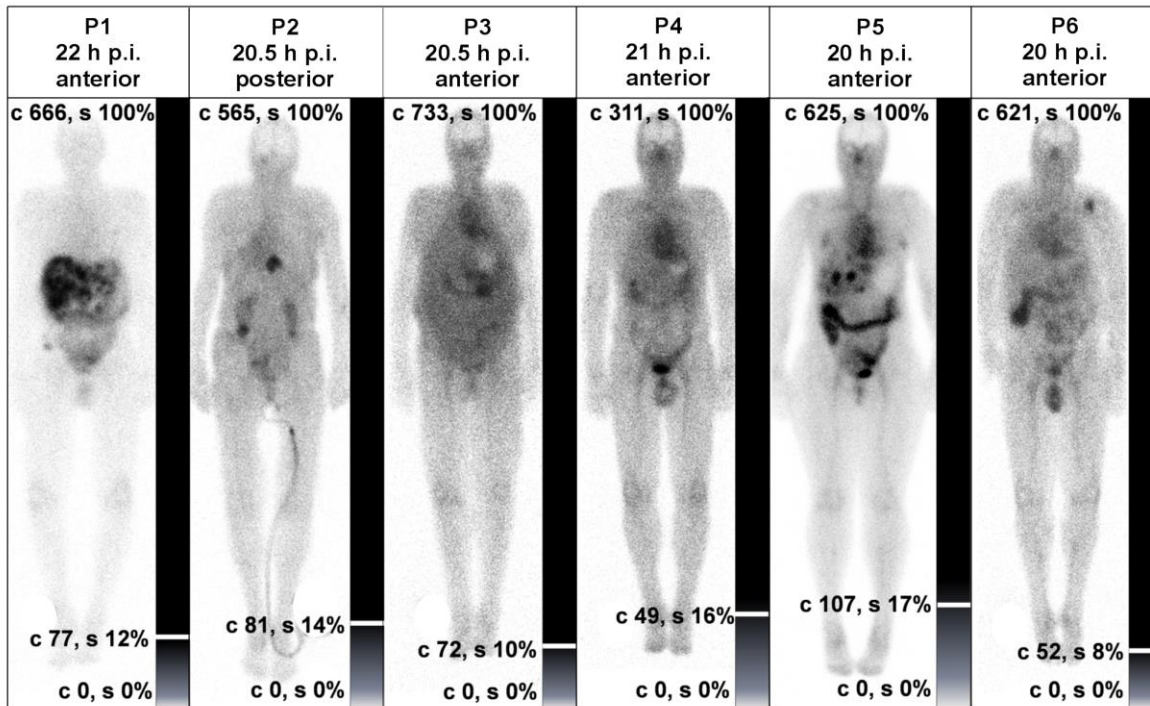

**SUPPLEMENTAL FIGURE 2.** Whole body planar scintigraphies of all patients 20-22 h after administration of  $^{177}\text{Lu}$ -3BP-227.

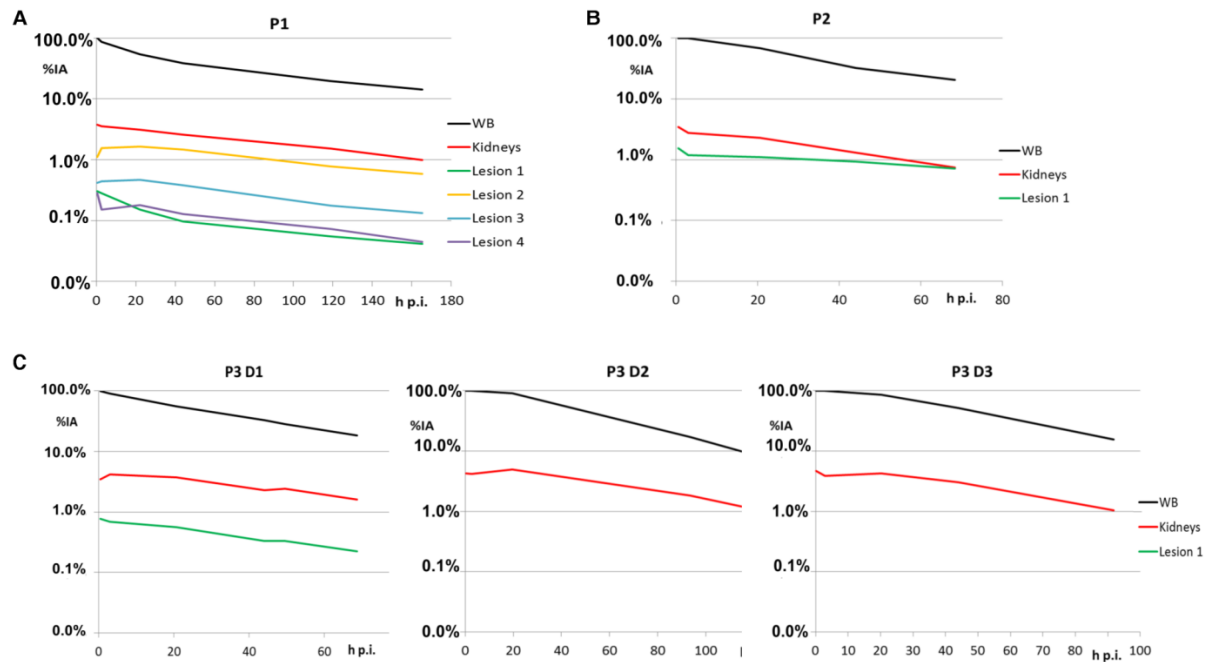

**SUPPLEMENTAL FIGURE 3.** Pharmacokinetics of  $^{177}\text{Lu}$ -3BP-227 for whole-body (WB), kidneys, and lesions 1 to 4 in patient 1 (A) and lesion 1 in patient 2 (B). (C) Pharmacokinetics of patient 3 for first dosimetry study (D1) with primary lesion, and second (D2) and third (D3) without lesions.

## SUPPLEMENTAL TABLE 1

Follow-up of hematological parameters

| Patient Number | Applications |      |     |            | Date of death | Parameter             | Hemoglobin (mmol/l) <sup>§</sup> |                | Leukocytes (Gpt/l) <sup>§</sup> |                | Thrombocytes (Gpt/l) <sup>§</sup> |                |
|----------------|--------------|------|-----|------------|---------------|-----------------------|----------------------------------|----------------|---------------------------------|----------------|-----------------------------------|----------------|
|                | Number       | Type | RoA | Date       |               | Timepoint             | pre-iDos/TRLT                    | post-iDos/TRLT | pre-iDos/TRLT                   | post-iDos/TRLT | pre-iDos/TRLT                     | post-iDos/TRLT |
|                |              |      |     |            |               | Test date             | 10/03/2014                       | 14/03/2014     | 10/03/2014                      | 14/03/2014     | 10/03/2014                        | 14/03/2014     |
| Patient 1      | 1            | iDos | IV  | 12/03/2014 | 21/03/2014    | <b>Value</b>          | 7.3                              | 7.4            | 10.2                            | 11.3           | 324                               | 244            |
|                |              |      |     |            |               | <b>Toxicity grade</b> | G1                               | G1             | G0                              | G0             | G0                                | G0             |
|                |              |      |     |            |               | <b>Date</b>           | 27/09/2014                       | 01/10/2014     | 27/09/2014                      | 01/10/2014     | 27/09/2014                        | 01/10/2014     |
| Patient 2      | 1            | iDos | IV  | 29/09/2014 | 02/11/2014    | <b>Value</b>          | 7.2                              | 6.6            | 20.2                            | 15.1           | 304                               | 205            |
|                |              |      |     |            |               | <b>Toxicity grade</b> | G1                               | G1             | G0                              | G0             | G0                                | G0             |
|                |              |      |     |            |               | <b>Date</b>           | 28/09/2014                       | 10/10/2014     | 28/09/2014                      | 10/10/2014     | 28/09/2014                        | 10/10/2014     |
| Patient 3      | 1            | iDos | IV  | 29/09/2014 |               | <b>Value</b>          | 6.6                              | 11.4 (g/dl)    | 4.8                             | 5.0 (nl)       | 141                               | 152 (nl)       |
|                |              |      |     |            |               | <b>Toxicity grade</b> | G1                               | G1             | G0                              | G0             | G1                                | G0             |
|                |              |      |     |            |               | <b>Date</b>           | 18/11/2014                       | 02/12/2014     | 18/11/2014                      | 02/12/2014     | 18/11/2014                        | 02/12/2014     |
|                | 2            | TRLT | IP  | 20/11/2014 |               | <b>Value</b>          | 7.6                              | 11.6 (g/dl)    | 5                               | 6.7 (nl)       | 196                               | 169 (nl)       |
|                |              |      |     |            |               | <b>Toxicity grade</b> | G1                               | G1             | G0                              | G0             | G0                                | G0             |
|                |              |      |     |            |               | <b>Date</b>           | 26/01/2015                       | 10/02/2015     | 26/01/2015                      | 10/02/2015     | 26/01/2015                        | 10/02/2015     |
|                | 3            | TRLT | IP  | 28/01/2015 |               | <b>Value</b>          | 6.7                              | 10.8 (g/dl)    | 4.7                             | 4.5 (nl)       | 147                               | 130 (nl)       |
|                |              |      |     |            |               | <b>Toxicity grade</b> | G1                               | G1             | G0                              | G0             | G1                                | G1             |
|                |              |      |     |            |               | <b>Date</b>           | 23/03/2015                       | 31/03/2015     | 23/03/2015                      | 31/03/2015     | 23/03/2015                        | 31/03/2015     |
|                | 4            | TRLT | IP  | 26/03/2015 | 25/08/2015    | <b>Value</b>          | 5.9 <sup>^</sup>                 | 6.9            | 6.8                             | 7              | 175                               | 210            |
|                |              |      |     |            |               | <b>Toxicity grade</b> | G2                               | G1             | G0                              | G0             | G0                                | G0             |
|                |              |      |     |            |               | <b>Date</b>           | 28/01/2015                       | 22/04/2015     | 28/01/2015                      | 22/04/2015     | 28/01/2015                        | 22/04/2015     |
| Patient 4      | 1            | iDos | IV  | 29/01/2015 | 01/01/2016    | <b>Value</b>          | 6.5                              | 6.9            | 2.4                             | 6              | 77                                | 122            |
|                |              |      |     |            |               | <b>Toxicity grade</b> | G1                               | G1             | G2                              | G0             | G1                                | G1             |
|                |              |      |     |            |               | <b>Date</b>           | 28/01/2015                       | 02/02/2015     | 28/01/2015                      | 02/02/2015     | 28/01/2015                        | 02/02/2015     |
| Patient 5      | 1            | iDos | IV  | 29/01/2015 |               | <b>Value</b>          | 5.5 <sup>^</sup>                 | 6.8            | 3.6                             | 3.5            | 181                               | 68             |
|                |              |      |     |            |               | <b>Toxicity grade</b> | G2                               | G1             | G1                              | G1             | G0                                | G2             |
|                |              |      |     |            |               | <b>Date</b>           | 22/02/2015                       | 27/02/2015     | 22/02/2015                      | 27/02/2015     | 22/02/2015                        | 27/02/2015     |

|           |   |      |    |            |            |                       |            |            |            |            |            |            |
|-----------|---|------|----|------------|------------|-----------------------|------------|------------|------------|------------|------------|------------|
|           | 2 | TRLT | IV | 25/02/2015 | 20/05/2015 | <b>Value</b>          | 6.4        | 7.1        | 6.2        | 10.4       | 238        | 244        |
|           |   |      |    |            |            | <b>Toxicity grade</b> | G1         | G1         | G0         | G0         | G0         | G0         |
|           |   |      |    |            |            | <b>Date</b>           | 24/02/2015 | 01/06/2015 | 24/02/2015 | 01/06/2015 | 24/02/2015 | 01/06/2015 |
| Patient 6 | 1 | iDos | IV | 25/02/2015 |            | <b>Value</b>          | 8.0        | 7.4        | 10.8       | 12         | 196        | 293        |
|           |   |      |    |            |            | <b>Toxicity grade</b> | G1         | G1         | G0         | G0         | G0         | G0         |
|           |   |      |    |            |            | <b>Date</b>           | 14/06/2015 | 02/07/2015 | 14/06/2015 | 02/07/2015 | 14/06/2015 | 02/07/2015 |
|           | 2 | TRLT | IV | 15/06/2015 | 24/07/2015 | <b>Value</b>          | 7.1        | 6.8        | 13.6       | 10.4       | 271        | 291        |
|           |   |      |    |            |            | <b>Toxicity grade</b> | G1         | G1         | G0         | G0         | G0         | G0         |

TRLT, targeted radio-ligand therapy; iDos, initial activity administered for dosimetry and/or *in vivo* assessment; RoA, route of administration; § units for external laboratory values indicated in brackets along with their respective values; IV, intravenous; IP, intraperitoneal; ^ patient required 2 packed red blood cell transfusion before iDos/TRLT; Toxicity grade reported according to CTCAE v4.03

## SUPPLEMENTAL TABLE 2

Follow-up of renal function parameters

| Patient Number | Applications |      |     |            | Date of death | Parameter             | Urea* (mmol/l) <sup>§</sup> |                | Creatinine (µmol/l) <sup>§</sup> |                | eGFR (ml/min/1.73m <sup>2</sup> ) <sup>§</sup> |                |
|----------------|--------------|------|-----|------------|---------------|-----------------------|-----------------------------|----------------|----------------------------------|----------------|------------------------------------------------|----------------|
|                | Number       | Type | RoA | Date       |               | Timepoint             | pre-iDos/TRLT               | post-iDos/TRLT | pre-iDos/TRLT                    | post-iDos/TRLT | pre-iDos/TRLT                                  | post-iDos/TRLT |
|                |              |      |     |            |               | Test date             | 10/03/2014                  | 14/03/2014     | 10/03/2014                       | 14/03/2014     | 10/03/2014                                     | 14/03/2014     |
| Patient 1      | 1            | iDos | IV  | 12/03/2014 | 21/03/2014    | <b>Value</b>          | 9.6                         | 14.2           | 84                               | 79             | >60                                            | >60            |
|                |              |      |     |            |               | <b>Toxicity grade</b> | -                           | -              | G0                               | G0             | G0                                             | G0             |
|                |              |      |     |            |               | <b>Date</b>           | 27/09/2014                  | NA             | 27/09/2014                       | 09/10/2014     | 27/09/2014                                     | 09/10/2014     |
| Patient 2      | 1            | iDos | IV  | 29/09/2014 | 02/11/2014    | <b>Value</b>          | 8.1                         | -              | 56                               | 51             | >60                                            | >60            |
|                |              |      |     |            |               | <b>Toxicity grade</b> | -                           | -              | G0                               | G0             | G0                                             | G0             |
|                |              |      |     |            |               | <b>Date</b>           | 28/09/2014                  | 10/10/2014     | 28/09/2014                       | 10/10/2014     | 28/09/2014                                     | NA             |
| Patient 3      | 1            | iDos | IV  | 29/09/2014 |               | <b>Value</b>          | 3.9                         | 28 (mg/dl)     | 65                               | 0.65 (mg/dl)   | >60                                            | -              |
|                |              |      |     |            |               | <b>Toxicity grade</b> | -                           | -              | G0                               | G0             | G0                                             | -              |
|                |              |      |     |            |               | <b>Date</b>           | 18/11/2014                  | 02/12/2014     | 18/11/2014                       | 02/12/2014     | 18/11/2014                                     | NA             |
|                | 2            | TRLT | IP  | 20/11/2014 |               | <b>Value</b>          | 8.9                         | 64 (mg/dl)     | 69                               | 0.62 (mg/dl)   | >60                                            | -              |
|                |              |      |     |            |               | <b>Toxicity grade</b> | -                           | -              | G0                               | G0             | G0                                             | -              |
|                |              |      |     |            |               | <b>Date</b>           | 26/01/2015                  | 10/02/2015     | 26/01/2015                       | 10/02/2015     | 26/01/2015                                     | NA             |
|                | 3            | TRLT | IP  | 28/01/2015 |               | <b>Value</b>          | 9.4                         | 47 (mg/dl)     | 70                               | 0.72 (mg/dl)   | >60                                            | -              |
|                |              |      |     |            |               | <b>Toxicity grade</b> | -                           | -              | G0                               | G0             | G0                                             | -              |
|                |              |      |     |            |               | <b>Date</b>           | 23/03/2015                  | 31/03/2015     | 23/03/2015                       | 31/03/2015     | 23/03/2015                                     | 31/03/2015     |
|                | 4            | TRLT | IP  | 26/03/2015 | 25/08/2015    | <b>Value</b>          | 10.9                        | 4.2            | 71.5                             | 71.9           | >60                                            | >60            |
|                |              |      |     |            |               | <b>Toxicity grade</b> | -                           | -              | G0                               | G0             | G0                                             | G0             |
|                |              |      |     |            |               | <b>Date</b>           | 28/01/2015                  | 22/04/2015     | 28/01/2015                       | 22/04/2015     | 28/01/2015                                     | 22/04/2015     |
| Patient 4      | 1            | iDos | IV  | 29/01/2015 | 01/01/2016    | <b>Value</b>          | 4.8                         | 5.3            | 64                               | 65.1           | >60                                            | >60            |
|                |              |      |     |            |               | <b>Toxicity grade</b> | -                           | -              | G0                               | G0             | G0                                             | G0             |
|                |              |      |     |            |               | <b>Date</b>           | 28/01/2015                  | 02/02/2015     | 28/01/2015                       | 02/02/2015     | 28/01/2015                                     | 02/02/2015     |
| Patient 5      | 1            | iDos | IV  | 29/01/2015 |               | <b>Value</b>          | 7.2                         | 5.0            | 0.74                             | 0.74           | >60                                            | >60            |
|                |              |      |     |            |               | <b>Toxicity grade</b> | -                           | -              | G0                               | G0             | G0                                             | G0             |
|                |              |      |     |            |               | <b>Date</b>           | 22/02/2015                  | 27/02/2015     | 22/02/2015                       | 27/02/2015     | 22/02/2015                                     | 27/02/2015     |
|                | 2            | TRLT | IV  | 25/02/2015 | 20/05/2015    | <b>Value</b>          | 3.8                         | 8.3            | 65.8                             | 71.1           | >60                                            | >60            |

|           |   |      |    |            |            |                       |            |            |            |            |            |            |
|-----------|---|------|----|------------|------------|-----------------------|------------|------------|------------|------------|------------|------------|
|           |   |      |    |            |            | <b>Toxicity grade</b> | -          | -          | G0         | G0         | G0         | G0         |
|           |   |      |    |            |            |                       |            |            |            |            |            |            |
|           |   |      |    |            |            | <b>Date</b>           | 24/02/2015 | 01/06/2015 | 24/02/2015 | 01/06/2015 | 24/02/2015 | 01/06/2015 |
| Patient 6 | 1 | iDos | IV | 25/02/2015 |            | <b>Value</b>          | 5.9        | 4.8        | 74.5       | 107.3      | >60        | >60        |
|           |   |      |    |            |            | <b>Toxicity grade</b> | -          | -          | G0         | G1         | G0         | G0         |
|           |   |      |    |            |            | <b>Date</b>           | 14/06/2015 | 18/06/2015 | 14/06/2015 | 18/06/2015 | 14/06/2015 | 18/06/2015 |
|           | 2 | TRLT | IV | 15/06/2015 | 24/07/2015 | <b>Value</b>          | 3.5        | 7.5        | 82         | 81         | >60        | >60        |
|           |   |      |    |            |            | <b>Toxicity grade</b> | -          | -          | G0         | G0         | G0         | G0         |

TRLT, targeted radio-ligand therapy; iDos, initial activity administered for dosimetry and/or in-vivo assessment; RoA, route of administration; \* not graded according to CTCAE; § units for external laboratory values indicated in brackets along with their respective values; IV, intravenous; IP, intraperitoneal; NA, not available; Toxicity grade reported according to CTCAE v4.03

### SUPPLEMENTAL TABLE 3

Follow up of hepatic function parameters

| Patient Number | Applications |      |     |            | Date of death | Parameter             | Bilirubin (µmol/l) <sup>§</sup> |                | ALT (µmol/s/l) <sup>§</sup> |                | AST (µmol/s/l) <sup>§</sup> |                | GGT (µmol/s/l) <sup>§</sup> |                |
|----------------|--------------|------|-----|------------|---------------|-----------------------|---------------------------------|----------------|-----------------------------|----------------|-----------------------------|----------------|-----------------------------|----------------|
|                | Number       | Type | RoA | Date       |               | Timepoint             | pre-iDos/TRLT                   | post-iDos/TRLT | pre-iDos/TRLT               | post-iDos/TRLT | pre-iDos/TRLT               | post-iDos/TRLT | pre-iDos/TRLT               | post-iDos/TRLT |
|                |              |      |     |            |               | Test date             | 10/03/2014                      | 14/03/2014     | 10/03/2014                  | 14/03/2014     | 10/03/2014                  | 14/03/2014     | 10/03/2014                  | 14/03/2014     |
| Patient 1      | 1            | iDos | IV  | 12/03/2014 | 21/03/2014    | <b>Value</b>          | 156                             | 229            | 1.78                        | 2.36           | 1.56                        | 2.06           | 57.67                       | 62.07          |
|                |              |      |     |            |               | <b>Toxicity grade</b> | G3                              | G4             | G2                          | G2             | G1                          | G1             | G4                          | G4             |
|                |              |      |     |            |               | <b>Date</b>           | 27/09/2014                      | NA             | 27/09/2014                  | NA             | 27/09/2014                  | NA             | 27/09/2014                  | NA             |
| Patient 2      | 1            | iDos | IV  | 29/09/2014 | 02/11/2014    | <b>Value</b>          | 8                               | -              | 0.26                        | -              | 0.64                        | -              | 3.28                        | -              |
|                |              |      |     |            |               | <b>Toxicity grade</b> | G0                              | -              | G0                          | -              | G0                          | -              | G2                          | -              |
|                |              |      |     |            |               | <b>Date</b>           | 28/09/2014                      | 10/10/2014     | 28/09/2014                  | 10/10/2014     | 28/09/2014                  | 10/10/2014     | 28/09/2014                  | 10/10/2014     |
| Patient 3      | 1            | iDos | IV  | 29/09/2014 |               | <b>Value</b>          | 7                               | 0.45 (mg/dl)   | 0.33                        | 31 (U/l)       | 0.44                        | 39 (U/l)       | 4.02                        | 288 (U/l)      |
|                |              |      |     |            |               | <b>Toxicity grade</b> | G0                              | G0             | G0                          | G0             | G0                          | G1             | G0                          | G3             |
|                |              |      |     |            |               | <b>Date</b>           | 18/11/2014                      | 02/12/2014     | 18/11/2014                  | 02/12/2014     | 18/11/2014                  | 02/12/2014     | 18/11/2014                  | 02/12/2014     |
|                | 2            | TRLT | IP  | 20/11/2014 |               | <b>Value</b>          | 6                               | 0.13 (mg/dl)   | 1.55                        | 115 (U/l)      | 1.68                        | 98 (U/l)       | 4.69                        | 297 (U/l)      |
|                |              |      |     |            |               | <b>Toxicity grade</b> | G0                              | G0             | G1                          | G2             | G1                          | G1             | G2                          | G3             |
|                |              |      |     |            |               | <b>Date</b>           | 26/01/2015                      | 10/02/2015     | 26/01/2015                  | 10/02/2015     | 26/01/2015                  | 10/02/2015     | 26/01/2015                  | 10/02/2015     |
|                | 3            | TRLT | IP  | 28/01/2015 |               | <b>Value</b>          | 4                               | 0.26 (mg/dl)   | 1.7                         | 83 (U/l)       | 1.39                        | 55 (U/l)       | 4.76                        | 251 (U/l)      |
|                |              |      |     |            |               | <b>Toxicity grade</b> | G0                              | G0             | G1                          | G1             | G1                          | G1             | G2                          | G3             |
|                |              |      |     |            |               | <b>Date</b>           | 23/03/2015                      | 02/04/2015     | 23/03/2015                  | 02/04/2015     | 23/03/2015                  | 02/04/2015     | 23/03/2015                  | 02/04/2015     |
|                | 4            | TRLT | IP  | 26/03/2015 | 25/08/2015    | <b>Value</b>          | 4                               | 2              | 0.73                        | 0.51           | 0.31                        | 0.26           | 2.86                        | 2.42           |
|                |              |      |     |            |               | <b>Toxicity grade</b> | G0                              | G0             | G1                          | G0             | G0                          | G0             | G1                          | G1             |
|                |              |      |     |            |               | <b>Date</b>           | 28/01/2015                      | 22/04/2015     | 28/01/2015                  | 22/04/2015     | 28/01/2015                  | 22/04/2015     | 28/01/2015                  | 22/04/2015     |
| Patient 4      | 1            | iDos | IV  | 29/01/2015 | 01/01/2016    | <b>Value</b>          | 8                               | 5              | 1.01                        | 0.19           | 0.66                        | 0.43           | 1.51                        | 3.4            |
|                |              |      |     |            |               | <b>Toxicity grade</b> | G0                              | G0             | G1                          | G0             | G0                          | G0             | G1                          | G2             |
|                |              |      |     |            |               | <b>Date</b>           | 28/01/2015                      | 03/02/2015     | 28/01/2015                  | 03/02/2015     | 28/01/2015                  | 03/02/2015     | 28/01/2015                  | 03/02/2015     |
| Patient 5      | 1            | iDos | IV  | 29/01/2015 |               | <b>Value</b>          | 17                              | 0.5 (mg/dl)    | 0.8                         | 48 (U/l)       | 0.87                        | 39 (U/l)       | 4.92                        | 402 (U/l)      |
|                |              |      |     |            |               | <b>Toxicity grade</b> | G0                              | G0             | G0                          | G1             | G0                          | G1             | G3                          | G4             |
|                |              |      |     |            |               | <b>Date</b>           | 22/02/2015                      | 16/03/2015     | 22/02/2015                  | 16/03/2015     | 22/02/2015                  | 16/03/2015     | 22/02/2015                  | 16/03/2015     |



|           |   |      |    |            |            |                       |            |             |            |            |            |            |            |            |
|-----------|---|------|----|------------|------------|-----------------------|------------|-------------|------------|------------|------------|------------|------------|------------|
|           | 2 | TRLT | IV | 25/02/2015 | 20/05/2015 | <b>Value</b>          | 4          | 0.3 (mg/dl) | 0.64       | 32 (U/l)   | 0.74       | 39 (U/l)   | 7.65       | 594 (UI)   |
|           |   |      |    |            |            | <b>Toxicity grade</b> | G0         | G0          | G0         | G0         | G0         | G1         | G3         | G4         |
|           |   |      |    |            |            | <b>Date</b>           | 24/02/2015 | 01/06/2015  | 24/02/2015 | 01/06/2015 | 24/02/2015 | 01/06/2015 | 24/02/2015 | 01/06/2015 |
| Patient 6 | 1 | iDos | IV | 25/02/2015 |            | <b>Value</b>          | 7          | 5           | 0.28       | 0.16       | 0.48       | 0.29       | 3.05       | 3.65       |
|           |   |      |    |            |            | <b>Toxicity grade</b> | G0         | G0          | G0         | G0         | G0         | G0         | G2         | G2         |
|           |   |      |    |            |            | <b>Date</b>           | 14/06/2015 | 05/07/2015  | 14/06/2015 | 05/07/2015 | 14/06/2015 | 05/07/2015 | 14/06/2015 | 05/07/2015 |
|           | 2 | TRLT | IV | 15/06/2015 | 24/07/2015 | <b>Value</b>          | 9          | 8           | 0.15       | 0.26       | 0.29       | 0.36       | 3.5        | 3.96       |
|           |   |      |    |            |            | <b>Toxicity grade</b> | G0         | G0          | G0         | G0         | G0         | G0         | G2         | G2         |

TRLT, targeted radio-ligand therapy; iDos, initial activity administered for dosimetry and/or in-vivo assessment; RoA, route of administration; § units for external laboratory values indicated in brackets along with their respective values; IV, intravenous; IP, intraperitoneal; ALT, alanine aminotransferase; AST, aspartate aminotransferase; GGT, gamma-glutamyl transferase; NA, not available; Toxicity grade reported according to CTCAE v4.03
